# Supplementary material for: Adeno-associated-virus-mediated delivery of CRISPR-CasRx induces efficient RNA knockdown in the mouse testis
Source: PubMed Central journal article supplement (PMC11234267; doi:10.7150/thno.95633), 2024-06-17
Supplement: thnov14p3827s1.pdf [file thnov14p3827s1.pdf]

# **Supporting Information**

## **Adeno-associated-virus-mediated delivery of CRISPR-CasRx induces efficient RNA knockdown in the mouse testis**

Kai Li<sup>†</sup>, Mengzhen Li<sup>†</sup>, Yanyun Luo<sup>†</sup>, Dingfeng Zou, Yahui Li, Xinyu Mang, Zexuan Zhang, Pengyu Li, Yan Lu, Shiyong Miao & Wei Song\*

Department of Biochemistry and Molecular Biology, State Key Laboratory of Common Mechanism Research for Major Diseases, Institute of Basic Medical Sciences, Chinese Academy of Medical Sciences and Peking Union Medical College, Beijing 100005, China.

<sup>†</sup>These authors contributed equally to this work

\* Corresponding author (Wei Song, email: [songwei@ibms.pumc.edu.cn](mailto:songwei@ibms.pumc.edu.cn))

### **Contents:**

Supplemental Figures S1-S4

Supplemental Tables S1-S4

# SF1

**A**

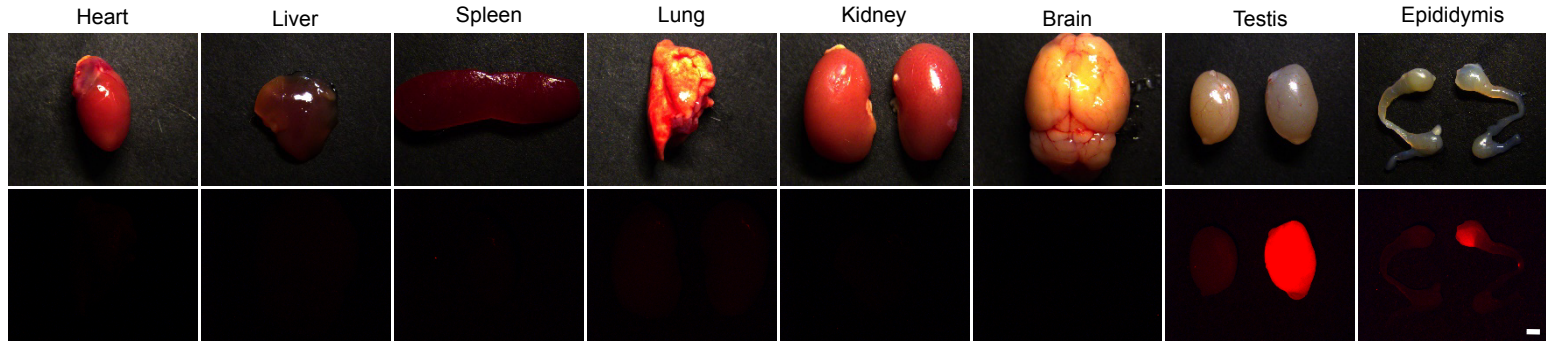

**B**

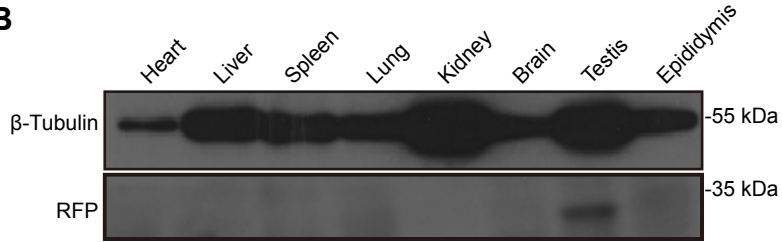

**C**

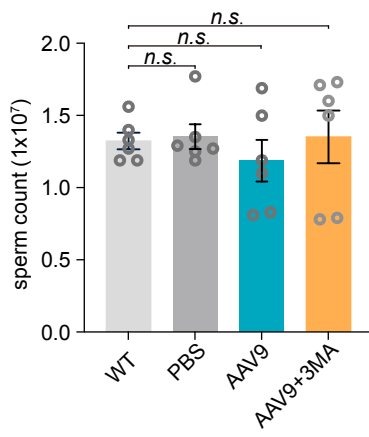

**D**

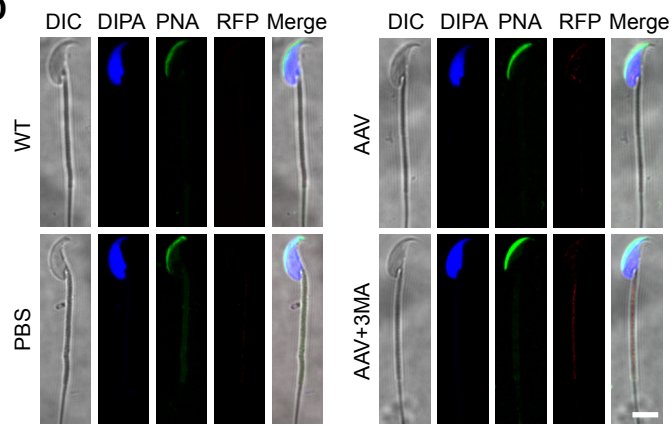

**Figure S1. Expression profiling of transgenic tissues and developmental assessment of spermatozoa after AAV microinjection into testicular seminiferous tubules.**

**(A)** Stereomicroscopic fluorescence imaging of various tissues from mice co-injected with AAV9-CMV-RFP and 3-MA. Scale bar: 1 mm.

**(B)** Western blotting analysis of RFP in various tissues from mice co-injected with AAV9-CMV-RFP and 3-MA.  $\beta$ -Tubulin was used as a loading control.

**(C)** Number of mature sperm from representative caudal epididymis 5 weeks after microinjection with PBS, AAV9-CMV-RFP or AAV9-CMV-RFP co-injection with 3-MA ( $n = 5$ ).

**(D)** Immunostaining of spermatozoa for PNA(green) ,RFP(red) from representative caudal epididymis 5 weeks after microinjection with PBS, AAV9-CMV-RFP or AAV9-CMV-RFP co-injection with 3-MA. Nuclei were stained with DAPI (blue). Scale bar: 5  $\mu$ m.

All data are presented as the mean  $\pm$  SEM.  $P$ -values were determined using the two-tailed Student's  $t$ -test; *n.s.*  $P > 0.05$ .

Figure S2

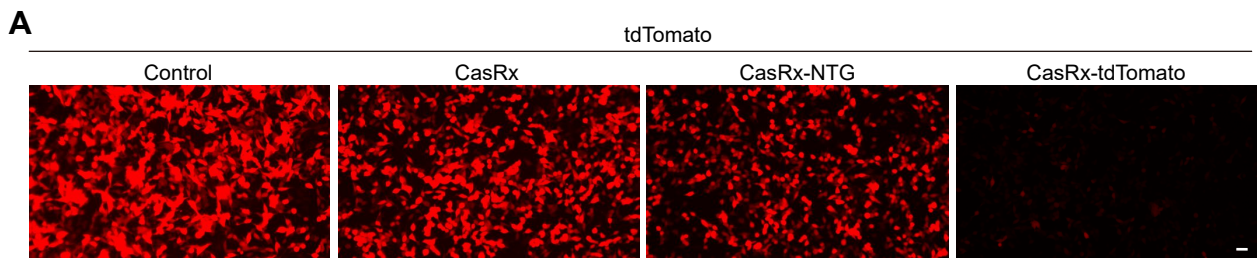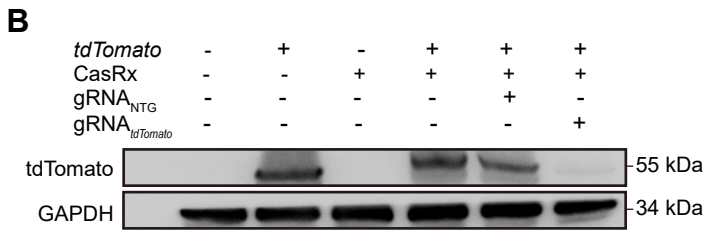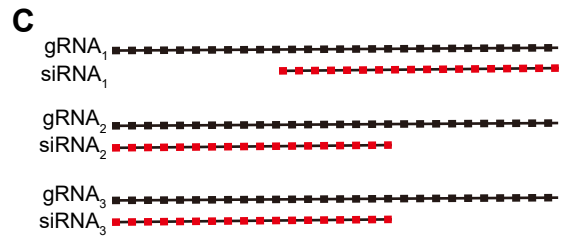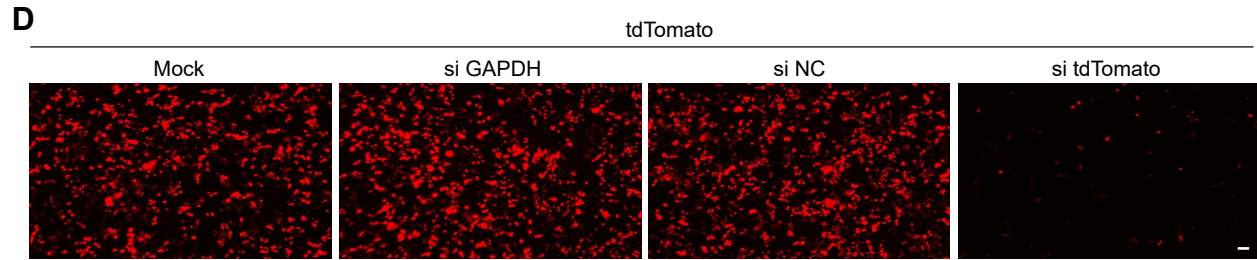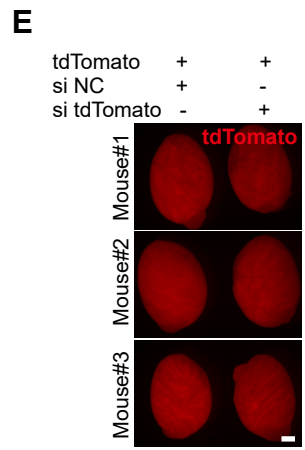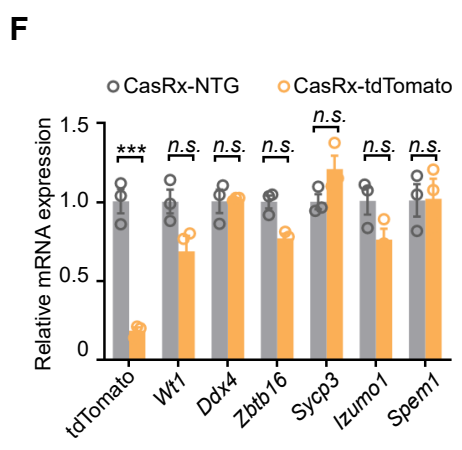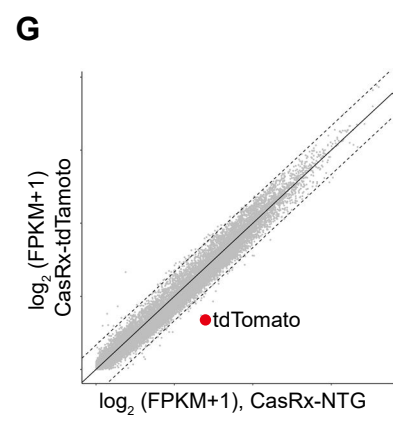

**Figure S2. CRISPR-CasRx enables efficient reporter mRNA knockdown in HEK293T cells.**

- (A)** Fluorescence imaging of tdTomato in HEK293T cells transfected with an expression vector encoding the tdTomato reporter as well as an all-in-one vector encoding CasRx and gRNAs. Scale bar: 40  $\mu$ m.
- (B)** Western blotting analysis of tdTomato expression in HEK293T cells after CRISPR-CasRx gene editing. GAPDH was used as a loading control.
- (C)** Schematic drawing of tdtomato-targeting guide RNA sequences and spacers position matched siRNA.
- (D)** Fluorescence imaging of tdTomato in HEK293T cells transfected with expression vector encoding tdTomato reporter as well as siRNAs. Scale bar: 40  $\mu$ m.
- (E)** Stereomicroscopic fluorescence imaging of representative testes received either microinjection with siRNA non-targeting or siRNA tdtomato-targeting together with AAV9-EFS-tdTomato. Scale bar: 1 mm.
- (F)** qRT-PCR analysis of representative functional genes expression in somatic and spermatogenic cells. Data were normalized to *Actb* expression ( $n = 3$  biologically independent samples).
- (G)** Scatterplot showing mRNA levels (determined by RNA-seq) in testes microinjected with AAV9-EFS-CasRx-tdTomato (y-axis) relative to those in the control testes treated with AAV9-EFS-CasRx-NTG (x-axis). tdTomato mRNA is highlighted in red. Dashed lines indicate a 2-fold difference in RNA levels ( $n = 3$  biologically independent samples).

**Figure S3**

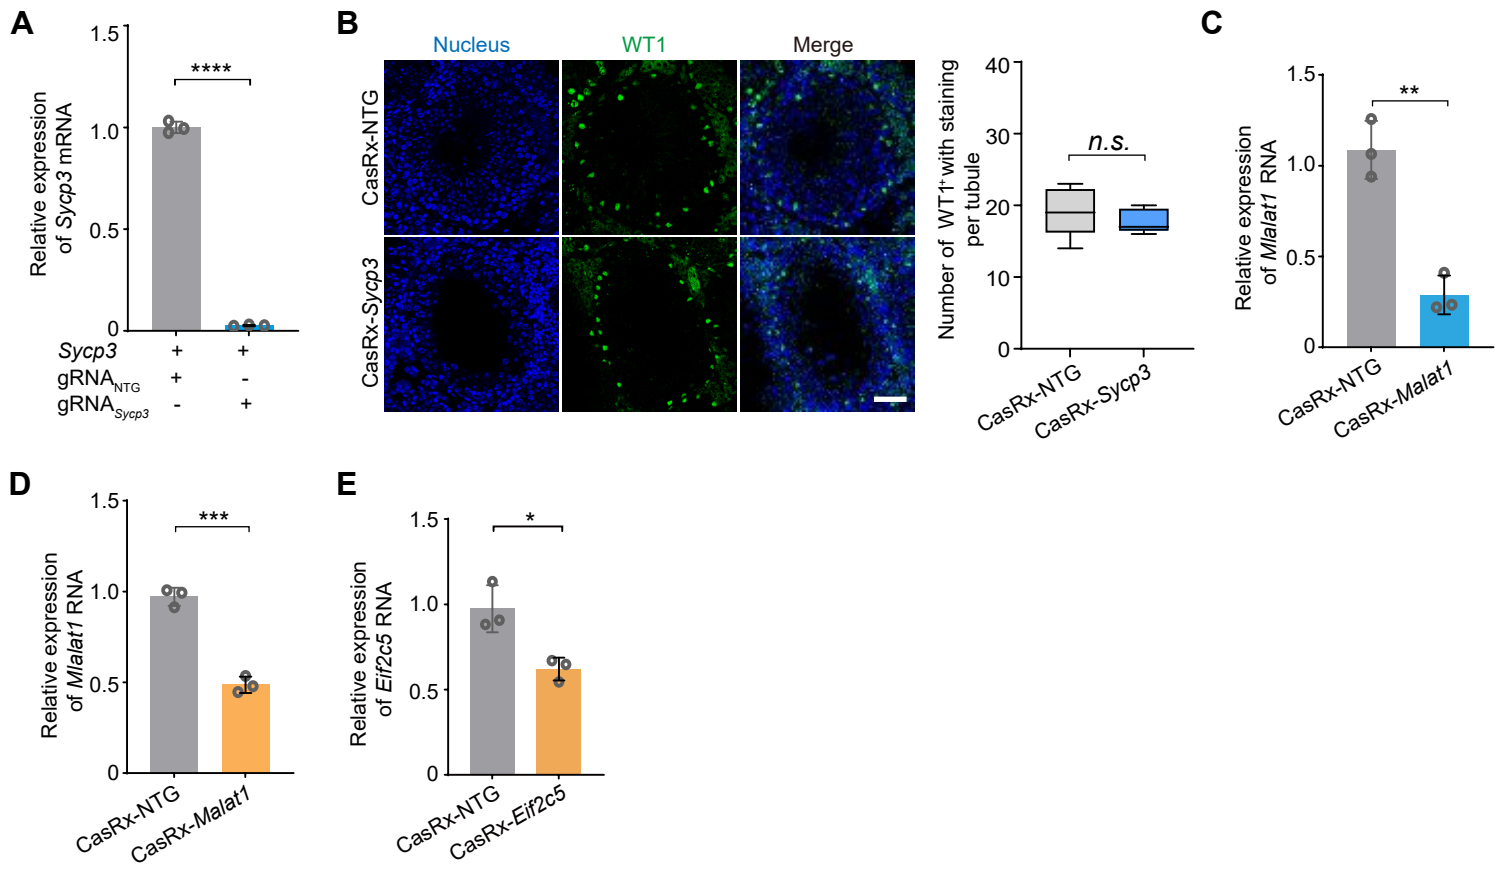

**Figure S3. Transcriptome editing of *Sycp3* and lncRNA-*Eif2c5* by AAV9-mediated CRISPR-CasRx in the testis *in vivo*.**

**(A)** qRT-PCR analysis of *Sycp3* mRNA knockdown efficiency in HEK293T cells transfected with the expression vector encoding SYCP3 as well as the all-in-one vector encoding CasRx and gRNAs. Data were normalized to *Actb* expression ( $n = 3$  biologically independent samples).

**(B)** Immunostaining of testicular sections from the control (CasRx-NTG) and SYCP3-depleted (CasRx-*Sycp3*) mice for WT1 (green). Nuclei were stained with DAPI (blue). Scale bar: 50  $\mu\text{m}$ . *Left*: representative images; *Right*: number of stained cells per tubule ( $n = 10$ ).

**(C)** qRT-PCR analysis of lncRNA-*Malat1* knockdown efficiency in GC1 cells. Data were normalized to *Actb* expression ( $n = 3$  biologically independent samples).

**(D)** qRT-PCR analysis of lncRNA-*Malat1* knockdown efficiency targeted by AAV9-mediated CRISPR-CasRx *in vivo*. Data were normalized to *Actb* expression ( $n = 3$  biologically independent samples).

**(E)** qRT-PCR analysis of lncRNA-*Eif2c5* knockdown efficiency *in vivo*. Data were normalized to *Actb* expression ( $n = 3$  biologically independent samples).

All data are presented as the mean  $\pm$  SEM. *P*-values were determined using the two-tailed Student's *t*-test; *n.s.*  $P > 0.05$ ; \* $P < 0.05$ ; \*\* $P < 0.01$ ; \*\*\* $P < 0.001$ ; \*\*\*\* $P < 0.0001$ .

**Figure S4**

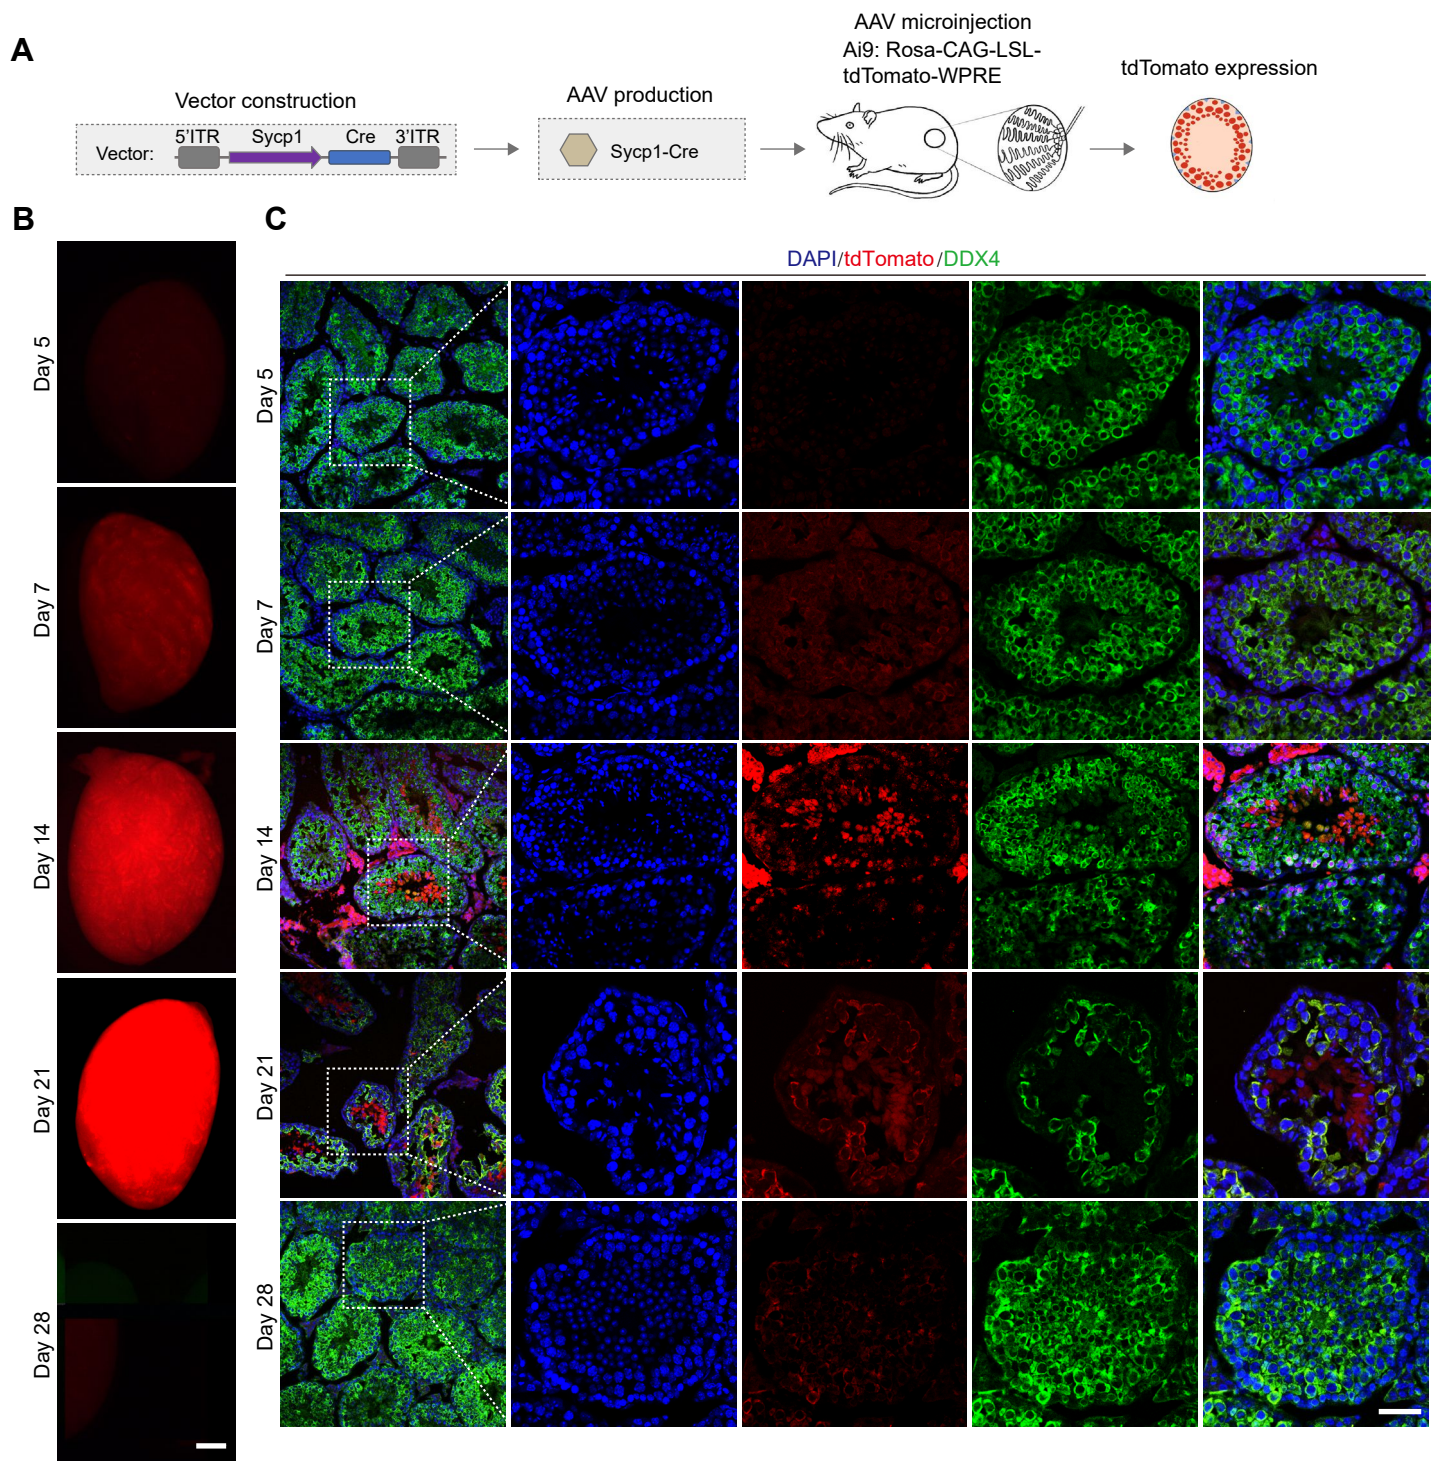



**Figure S4. AAV9 directs the *Sycp1* promoter to drive transgene expression in germ cells *in vivo*.**

**(A)** Schematic illustration of how AAV9-mediated germ-cell-specific transgene expression is driven by the *Sycp1* promoter. A vector carrying the *Sycp1* promoter and encoding the Cre recombinase is packaged into AAV9 (AAV9-*Sycp1*-Cre) and microinjected into the testes of an Ai9 mouse (Rosa26-CAG-LSL-tdTomato).

**(B)** Representative stereomicroscopic fluorescent images of testes from Ai9 mice on days 5, 7, 14, 21, and 28 after microinjection of AAV9-*Sycp1*-Cre. Scale bar: 1 mm.

**(C)** Immunostaining of testicular sections from Ai9 mice on days 5, 7, 14, 21, and 28 after microinjection of AAV9-*Sycp1*-Cre for DDX4 (green) and tdTomato (red). Nuclei were stained with DAPI (blue). Scale bar: 50  $\mu$ m.

## **Supplemental Tables**

Table S1. gRNA sequences used for knockdown of mRNA and lncRNA

Table S2. Primer sequences of PCR

Table S3. Primer sequences of qRT-PCR

Table S4. Antibodies used for immunofluorescence

Table S1. gRNA sequences used for knockdown of mRNA and lncRNA

|                 | <b>gRNA sequences 1# (5' to 3')</b> | <b>gRNA sequences 2# (5' to 3')</b> | <b>gRNA sequences 3# (5' to 3')</b> |
|-----------------|-------------------------------------|-------------------------------------|-------------------------------------|
| <i>tdTomato</i> | CATGCGCACCTTGAAGCGC<br>ATGAACTCTTT  | ATGGCCGTCATCAAAGAGT<br>TCATGCGCTTC  | TACGTGGACACCAAGCTGG<br>ACATCACCTCC  |
| <i>Sycp3</i>    | AACATCTTCAATTATCCCA<br>GCAGATCTTTT  | CCCAGAATGCTTTCTTCCAC<br>CAGGCACCAT  | AATTTCTGTATATCCAGTTC<br>CCACTGCTGC  |
| <i>Malat1</i>   | CCAGATGTTAAAACAAGCC<br>CAGGGCCTCTC  | AACATTTACCTAAGGCAGC<br>ACAGCAAAGGG  | TCGTTTTAATCTACAAGGC<br>CGACCTTCAAA  |
| <i>Eif2c5</i>   | TAATACACTCGAAGTACCA<br>GCAGGTCCCAC  | ATACCTTTTAAAGTACGGC<br>ACATACAGTTG  | CAGATGATAGATAATGGAA<br>CCAGGCTTTTG  |
| <i>NTG</i>      | TCACCAGAAGCGTACCATA<br>CTCACGAACAG  | CTACCTGGTAGCCCTTGTAT<br>TTGATCAGGC  | TGCCACTACTGTTTCATGATC<br>AGGGCGATGG |

Table S2. Primer sequences of PCR

|                                                            | <b>Forward primer (5' to 3')</b>                                   | <b>Reverse primer (5' to 3')</b>                                          |
|------------------------------------------------------------|--------------------------------------------------------------------|---------------------------------------------------------------------------|
| NLS-Cas13d<br>- NLS                                        | TTTGCCGCCAGAACACAGGACCGGTGCC<br>ACCATGAGCCCCAAGAAGAAG              | TTATCATGTCTGCTCGAAGCGGCCTTAA<br>GCGTAATCTGGAACATCGTATGGGTAAG<br>CG        |
| U6-DRs-<br>gRNAs<br>(Vector2#)                             | CAAATGTGGTAAAATCGAGAGCATGGC<br>TACGAGGGCCTATTTCCCATGATTCCTT<br>CAT | TGATTAACCCGCCATGCTACTTATCTAC<br>ATGCGTAAGGAGAAAATACCGCATCAG<br>A          |
| <i>Stra8</i> promoter                                      | GATCAATTCAATTCACGCGTATCCCCTA<br>TTCCCCTCTC                         | CATGGTGGCACTAGGCTAGCTCTAGAGG<br>GATCCCCGTCGCAGA                           |
| <i>Hspa2</i> promoter                                      | GATCAATTCAATTCACGCGTCGGTCGTT<br>CTACATTACAGGTC                     | GGTGGCACTAGGCTAGCGGGATCCCCTG<br>CCTGCTG                                   |
| <i>Sycp1</i> promoter                                      | GATCAATTCAATTCACGCGTATCTTGTC<br>CTAGGTATTA AACAGG                  | CATGGTGGCACTAGGCTAGCGGGATCC<br>GGGAGGCT                                   |
| <i>Pgk2</i> promoter                                       | GATCAATTCAATTCACGCGTTCACAAAG<br>TCTAATAGCAGATCA                    | GCACTAGGCTAGCGGGATCCTTGGCCCC<br>GCCTTTCTTTGTGAG                           |
| Cre                                                        | TCCCCTAGCCTAGTGCCACCATGCCCA<br>AGAAGAAGAGGAAGGTGTCCAATT            | AGCGTAATCTGGAACATCGTATGGGTAA<br>GCGGCCGCATCGCCATCTTCCAGCAGGC<br>GCACCATTG |
| U6-DRs-<br>gRNAs (AAV-<br><i>Sycp1</i> -Cre-U6-<br>gRNAs ) | CAAATGTGGTAAAATCGAGAGCATGGC<br>TACGAGGGCCTATTTCCCATGATTCCTT<br>CAT | TGATTAACCCGCCATGCTACTTATCTAC<br>ATGCGTAAGGAGAAAATACCGCATCAG<br>A          |

Table S3. Primer sequences of qRT-PCR

|                 | Forward primer (5' to 3') | Reverse primer (5' to 3') |
|-----------------|---------------------------|---------------------------|
| <i>Actb</i>     | GGCTGTATTCCCCTCCATCG      | CCAGTTGGTAACAATGCCATGT    |
| <i>Gapdh</i>    | ACCCAGAAGACTGTGGATGG      | GGATGCAGGGATGATGTTCT      |
| <i>Gdnf</i>     | CTTCGAGAAGCCTCTTACCG      | GCCACTTGGAGTTAATGTCC      |
| <i>Fgf2</i>     | CATAGCAAGGTACCGGTTGG      | CTCTACTGCAAGAACGGCG       |
| <i>Cxcl12</i>   | TGCATCAGTGACGGTAAACCA     | TTCTTCAGCCGTGCAACAATC     |
| <i>Csf1</i>     | GGCTTGGCTTGGGATGATTCT     | GAGGGTCTGGCAGGTACTC       |
| <i>Wt1</i>      | GAGAGCCAGCCTACCATCC       | GGGTCCTCGTGTGTTGAAGGAA    |
| <i>Gfar1</i>    | CACTCCTGGATTGCTGATGT      | AGTGTGCGGTACTTGGTGC       |
| <i>Zbtb16</i>   | CTGGGACTTTGTGCGATGTG      | CGGTGGAAGAGGATCTCAAACA    |
| <i>Sohl1</i>    | AGGAGGCGGATCTCGTTGA       | GTCTGCAATCTGATTCGCCAG     |
| <i>Kit</i>      | TGTGGCTAAAGATGAACCCTC     | ACACTCCAGAATCGTCAACTC     |
| <i>Sohl2</i>    | GGGCAGGGCAGAGTAAATCTT     | CAAACGAGTTAGCAGCCAAAAG    |
| <i>Dazl</i>     | ATACCTCCGGCTTATACAACCTGT  | GACTTCTTTTGCGGGCCATTT     |
| <i>Sycp1</i>    | CAAAAGCCCTTCACACTGTTCG    | GTTTTCCCGACTGGACATTGTAA   |
| <i>Sycp3</i>    | AGCCAGTAACCAGAAAATTGAGC   | CCACTGCTGCAACACATTGATA    |
| <i>Ddx4</i>     | GCTTCATCAGATATTGGCGAGT    | GCTTGAAAACCCTCTGCTT       |
| <i>Clgn</i>     | CCAGGGTGTGGACTATGTTTG     | CCCCGAGGAAGGTTTCATCTTAA   |
| <i>tdTomato</i> | CCTGTTCCCTGGGGCATGG       | TGATGACGGCCATGTTGTTG      |
| <i>Izumo1</i>   | ATGGGGCCGCATTTTACACTC     | TCTTTAGCGCATCTGTCAAAA     |
| <i>Spem1</i>    | GGGTGGGCCTCGTATCAAAAC     | ATGCGGATTTGGCTCCAGAG      |
| <i>Eif2c5</i>   | ATTGTGGTATGAATGTGAACT     | GAAGCAGATGATAGATAATGGAA   |
| <i>Malat1</i>   | GTTACCAGCCCAAACCTCAA      | CTACATTCCCACCCAGCACT      |

Table S4. Antibodies used for immunofluorescence

| Antibodies description                                                       | SOURCE                   | IDENTIFIER       |
|------------------------------------------------------------------------------|--------------------------|------------------|
| Anti-c-KIT Antibody                                                          | Abcam                    | ab283653         |
| Anti-DDX4 Antibody                                                           | Abcam                    | ab270534/ab27591 |
| Anti-SYCP3 Antibody                                                          | Santa Cruz               | sc-74569         |
| Anti-WT1 Antibody                                                            | Abcam                    | ab89901          |
| Lectin PNA from <i>Arachis hypogaea</i> (peanut), Alexa Fluor® 488 conjugate | Abcam                    | ab70472          |
| Goat anti-Mouse Alexa Fluor 488                                              | Thermo Fisher Scientific | A-11001          |
| Goat anti-Rabbit Alexa Fluor 488                                             | Thermo Fisher Scientific | A-11008          |
| Goat anti-Mouse Alexa Fluor 594                                              | Thermo Fisher Scientific | A-11005          |
| Goat anti-Rabbit Alexa Fluor 594                                             | Thermo Fisher Scientific | A-11012          |
| Goat anti-Rabbit Alexa Fluor 647                                             | Thermo Fisher Scientific | A-21245          |
